# Supplementary material
Source: Springer Nature journal article supplement (https://www.springermedizin.de/resource/supplementary/13063_2008_271_MOESM4_ESM.pdf/9622444)

**Cummulative Z-Score**

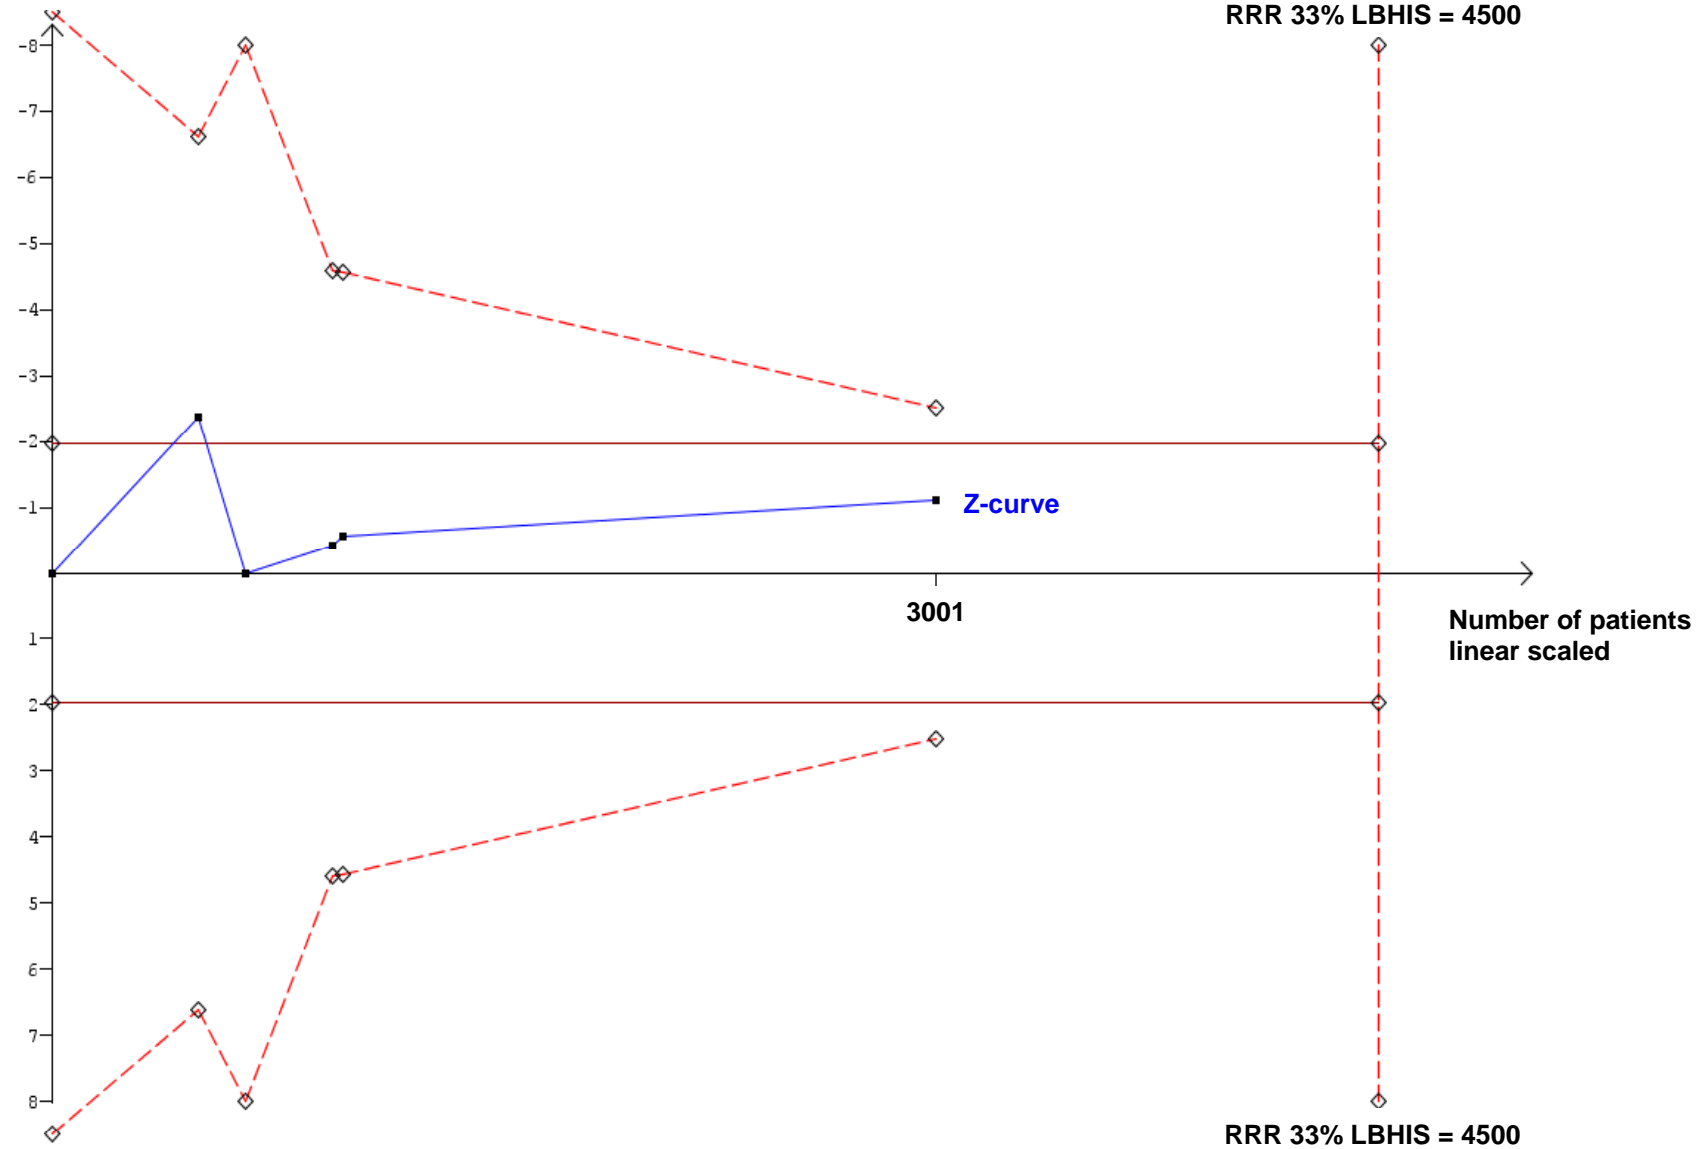

Supplement: MOESM4 [file 9622444]
